# Supplementary material for: Accuracy of Molecular Data Generated with FFPE Biospecimens: Lessons from the Literature
Source: Oxford University Press journal article supplement (doi:10.1158/0008-5472.can-14-2378), 2015-04-03
Supplement: 00085472can142378-sup-136286_1_supp_2771159_ng2c9c.doc [file 00085472can142378-sup-136286_1_supp_2771159_ng2c9c.doc]

| Reference | Year | Analyte | Scope | Assay | Number of biospecimens | | FFPE Storage duration |
| --- | --- | --- | --- | --- | --- | --- | --- |
| Case-matched* | Unmatched  FFPE |
| 1 | 2011 | miRNA | S  EP | Real-time qRT-PCR  Affymetrix GeneChip miRNA array | 2 |  | Not specified |
| 2 | 2009 | mRNA | S | Real-time qRT-PCR | 21 |  | 5-11 y |
| 3 | 2010 | mRNA | WG | Affymetrix Human U133 microarray (with WTA) | 15 |  | 0.5-7.5 y |
| 6 | 2009 | SNP, CN | WG | Next-generation sequencing | 0 | 7 | 1 or 18 y |
| 7 | 2009 | CN | WG | Molecular inversion probe microarray | 63 | 93 | 0.5-28 y |
| 8 | 2007 | SNP, CN | WG | Affymetrix GeneChip Human Mapping microarray | 5 | 25 | 3 y |
| 9 | 2012 | SNP | S | Real-time PCR (with WGA) | 50 |  | <12 y |
| 10 | 2012 | SNP, CN | WG | Affymetrix 250K SNP microarray (with WGA) | 2 | 6 | < 2 y |
| 11 | 2012 | Methylation | WG | Infinium Methlyation 27K Chip microarray | 12 |  | <3 years |
| 12 | 2014 | Methylation | WG | Infinium BeadChip microarray | 25 |  | Not specified |
| 13 | 2014 | Methylation | WG | Infinium HumanMethylation450 BeadChip microarrary | 21 |  | Not specified |
| 14 | 2012 | Methylation | S | Pyrosequencing | 40 |  | Not specified |
| 15 | 2011 | SNP | WG  WG | Next-generation sequencing  Affymetric 6.0 SNP array | 5 |  | Not specified |
| 16 | 2005 | SNP | WG  S | Illumina BeadArrays  Traditional sequencing | 5 |  | Not specified |
| 17 | 2012 | SNP | S | Traditional sequencing | 76 |  | <10 y |
| 18 | 2011 | SNP | S | High resolution melting and Traditional sequencing | 0 | 33 | <5 y |
| 19 | 2012 | SNP, CN | WG | Next-generation sequencing | 1 |  | Not specified |
| 20 | 2011 | SNP | S  S | Bead array with flow cytometric detection  Traditional sequencing | 0 | 86 | Not specified |
| 21 | 2004 | SNP | S | Traditional sequencing | 1 | 2 | Not specified |
| 22 | 2010 | SNP | WG  WG | Oligonucleotide microarray  SNP microarray | 4 |  | 5 y |
| 23 | 2009 | mRNA | WT  S | Agilent Whole Human Genome 4×44K microarrays  RT-PCR | 5 |  | Not specified |
| 24 | 2007 | mRNA | WT | Custom EST microarray | 2 |  | 3 y, 10 y |
| 25 | 2008 | mRNA | WT  WT | Human Exon 1.0 ST microarray  Affymetrix Human U133 microarray | 2 |  | Not specified |
| 26 | 2011 | mRNA | WT | DASL (Illumina Human-Ref 8 BeadChip V3 24K Whole genome chip microarray) | 25 |  | Not specified |
| 27 | 2008 | mRNA | WT | Affymetrix Human U133 microarray | 2 | 12 | 1-8 y |
| 28 | 2007 | mRNA | WT | Microarray (Custom Agilent oligonucleotide) | 5 |  | <5 y |
| 29 | 2010 | mRNA | WT | DASL (Illumina BeadChip) | 72 |  | 3-6 y |
| 30 | 2002 | mRNA | S | Real-time RT-PCR | 9 |  | Not specified |
| 31 | 2009 | mRNA | S | Real-time RT-PCR (TLDA arrays) | 7 |  | 4-70 mon |
| 32 | 2009 | mRNA | WT | DASL(Illumina BeadChip) | 1 |  | 3-13 y |
| 33 | 2012 | miRNA | EP | miRCURY LNA Microarray | 25 |  | Not specified |
| 34 | 2008 | miRNA | EP | FlexmiR Bead array | 12 |  | Not specified |
| 35 Mittembergher | 2011 | mRNA | WT | DASL (Illumina HumanRef-8 Expression BeadChip array) | 21 |  | <3 y |

SNP, single nucleotide polymorphism; CN, copy number; S, selective; WG, whole genome; WT, whole transcriptome; EP, expression profiling

*Case-matched FFPE and fresh or frozen tissue biospecimens.
